# Supplementary material
Source: publisher site journal article supplement (https://www.spandidos-publications.com/6663/downloadSupplementary)
Supplement: Supplementary file 1 [file downloadSupplementary]

## Sheet: Fig3
Table SIII. Raw data for cell cycle assay and western blot for detection of cell cycle proteins.
Cell cycle distribution after Cul3 knockdown (by flow cytometry)
KKU-213A-FR
	subG1					G1					S					G2M
	1st	2nd	3rd	average	SD	1st	2nd	3rd	average	SD	1st	2nd	3rd	average	SD	1st	2nd	3rd	average	SD
siNC	0.84	0.8	0.82	0.82	0.02	48.46	46.98	48.91	48.1167	1.00977	29.55	28.07	29.69	29.1033	0.897626	22.39	24.85	21.86	23.0333	1.59544
siCul3#1	4.17	3.17	1.23	2.85667	1.49484	63.94	68.1	67.99	66.6767	2.37066	18.77	17.76	18.28	18.27	0.505074	13.97	11.75	13.31	13.01	1.14
siCul3#2	0.95	1.31	2.37	1.54333	0.738196	67.2	68.51	67.25	67.6533	0.742316	19.01	19.78	19.73	19.5067	0.430852	13.47	11.03	11.15	11.8833	1.3754
KKU-213A-GR
	subG1					G1					S					G2M
	1st	2nd	3rd	average	SD	1st	2nd	3rd	average	SD	1st	2nd	3rd	average	SD	1st	2nd	3rd	average	SD
siNC	1.29	1.52	0.39	1.06667	0.597188	38.04	37.96	37.23	37.7433	0.446356	38.21	38.62	37.4	38.0767	0.620833	21.06	20.1	23.45	21.5367	1.72512
siCul3#1	3.89	3.17	3.44	3.5	0.363731	49.68	47.49	49.25	48.8067	1.16036	36.27	38.67	36.47	37.1367	1.33167	9.43	9.86	10.08	9.79	0.330606
siCul3#2	4.39	4.27	4.28	4.31333	0.0665833	50.73	50.96	50.4	50.6967	0.281484	33.95	33.68	34.62	34.0833	0.483977	10.17	10.36	10.02	10.1833	0.170392
Cell cycle protein expression after Cul3 knockdown in drug-resistant CCA cells by Western blot
KKU-213A-FR		Intensity			blank substraction
		IntDen1	IntDen2	IntDen3	IntDen1	IntDen2	IntDen3	Fold1	Fold2	Fold3	Average	SD
Cyclin D	siNC	87816	69537	82579	82961	64682	77724	1	1	1	1	0
	siCul3#1	23869	27137	25316	19014	22282	20461	0.229192	0.344485	0.263252	0.278976	0.0592333
	siCul3#2	45304	40782	30432	40449	35927	25577	0.487566	0.55544	0.329075	0.457361	0.116167
CDK4	siNC	56864	40817	59985	51518	35471	54639	1	1	1	1	0
	siCul3#1	50948	37579	45087	45602	32233	39741	0.885166	0.908714	0.727338	0.840406	0.0986254
	siCul3#2	38470	30717	27769	33124	25371	22423	0.64296	0.71526	0.410385	0.589535	0.159305
CDK6	siNC	106145	63345	81764	94537	51737	70156	1	1	1	1	0
	siCul3#1	47874	42182	48038	36266	30574	36430	0.383617	0.59095	0.519271	0.497946	0.105299
	siCul3#2	56973	47602	40940	45365	35994	29332	0.479865	0.695711	0.418097	0.531224	0.145759
Cell cycle protein expression after Cul3 knockdown in drug-resistant CCA cells by Western blot
KKU-213A-GR		Intensity			blank substraction
		IntDen1	IntDen2	IntDen3	IntDen1	IntDen2	IntDen3	Fold1	Fold2	Fold3	Average	SD
Cyclin D	siNC	66452	55700	45312	59021	48269	30817	1	1	1	1	0
	siCul3#1	15851	19312	29892	8420	11881	15397	0.142661	0.246141	0.499627	0.296143	0.183661
	siCul3#2	14204	19549	21921	6773	12118	7426	0.114756	0.251051	0.240971	0.202259	0.0759478
CDK4	siNC	665.382	12630	770.418	648.491	12006	753.527	1	1	1	1	0
	siCul3#1	576.312	8580	570.902	559.421	7956	554.011	0.86265	0.662669	0.735224	0.753514	0.101238
	siCul3#2	230.968	5168	187.349	214.077	4544	170.458	0.330116	0.378477	0.226214	0.311602	0.0778019
CDK6	siNC	56442	48105	35070	53577	38241	32117	1	1	1	1	0
	siCul3#1	41233	28896	25738	38368	19032	22785	0.716128	0.497686	0.709437	0.641084	0.124231
	siCul3#2	17898	27051	13160	15033	17187	10207	0.280587	0.449439	0.317807	0.349278	0.0887163

## Sheet: ANOVA-post hoc Fig3A-3B
Cell cycle distribution after Cul3 knockdown (by flow cytometry)												Cell cycle distribution after Cul3 knockdown (by flow cytometry)
KKU-213A-FR												KKU-213A-GR
												Descriptives
Statistic anlysis														N	Mean	Std. Deviation	Std. Error	95% Confidence Interval for Mean		Minimum	Maximum
Descriptives																		Lower Bound	Upper Bound
		N	Mean	Std. Deviation	Std. Error	95% Confidence Interval for Mean		Minimum	Maximum			subG1	SiNC	3	1.06667	0.597188	0.344787	-0.41683	2.55016	0.39	1.52
						Lower Bound	Upper Bound						SiCul#1	3	3.5	0.363731	0.21	2.59644	4.40356	3.17	3.89
subG1	SiNC	3	0.82	0.02	0.011547	0.770317	0.869683	0.8	0.84				SiCul#2	3	4.31333	0.0665833	0.0384419	4.14793	4.47874	4.27	4.39
	SiCul#1	3	2.85667	1.49484	0.863044	-0.856711	6.57004	1.23	4.17				Total	9	2.96	1.50458	0.501528	1.80347	4.11653	0.39	4.39
	SiCul#2	3	1.54333	0.738196	0.426198	-0.290447	3.37711	0.95	2.37			G1	SiNC	3	37.7433	0.446356	0.257704	36.6345	38.8521	37.23	38.04
	Total	9	1.74	1.22249	0.407496	0.800313	2.67969	0.8	4.17				SiCul#1	3	48.8067	1.16036	0.669934	45.9242	51.6892	47.49	49.68
G1	SiNC	3	48.1167	1.00977	0.58299	45.6083	50.6251	46.98	48.91				SiCul#2	3	50.6967	0.281484	0.162515	49.9974	51.3959	50.4	50.96
	SiCul#1	3	66.6767	2.37066	1.3687	60.7876	72.5657	63.94	68.1				Total	9	45.7489	6.09311	2.03104	41.0653	50.4325	37.23	50.96
	SiCul#2	3	67.6533	0.742316	0.428576	65.8093	69.4973	67.2	68.51			S	SiNC	3	38.0767	0.620833	0.358438	36.5344	39.6189	37.4	38.62
	Total	9	60.8156	9.62737	3.20912	53.4153	68.2158	46.98	68.51				SiCul#1	3	37.1367	1.33167	0.768838	33.8286	40.4447	36.27	38.67
S	SiNC	3	29.1033	0.897626	0.518245	26.8735	31.3332	28.07	29.69				SiCul#2	3	34.0833	0.483977	0.279424	32.8811	35.2856	33.68	34.62
	SiCul#1	3	18.27	0.505074	0.291605	17.0153	19.5247	17.76	18.77				Total	9	36.4322	1.96657	0.655523	34.9206	37.9439	33.68	38.67
	SiCul#2	3	19.5067	0.430852	0.248752	18.4364	20.577	19.01	19.78			G2M	SiNC	3	21.5367	1.72512	0.995998	17.2512	25.8221	20.1	23.45
	Total	9	22.2933	5.16575	1.72192	18.3226	26.2641	17.76	29.69				SiCul#1	3	9.79	0.330606	0.190875	8.96873	10.6113	9.43	10.08
G2M	SiNC	3	23.0333	1.59544	0.921129	19.07	26.9966	21.86	24.85				SiCul#2	3	10.1833	0.170392	0.0983757	9.76006	10.6066	10.02	10.36
	SiCul#1	3	13.01	1.14	0.658179	10.1781	15.8419	11.75	13.97				Total	9	13.8367	5.8445	1.94817	9.34418	18.3291	9.43	23.45
	SiCul#2	3	11.8833	1.3754	0.794089	8.46664	15.3	11.03	13.47
	Total	9	15.9756	5.449	1.81633	11.7871	20.164	11.03	24.85			Tests of Homogeneity of Variances
														Levene Statistic	df1	df2	Sig.
Tests of Homogeneity of Variances												subG1	Based on Mean	4.35088	2	6	0.0679744
		Levene Statistic	df1	df2	Sig.								Based on Median	0.942989	2	6	0.44044
subG1	Based on Mean	4.60975	2	6	0.0612706								Based on Median and with adjusted df	0.942989	2	2.96853	0.481898
	Based on Median	1.70809	2	6	0.25872								Based on trimmed mean	3.95185	2	6	0.0803644
	Based on Median and with adjusted df	1.70809	2	3.128	0.315211							G1	Based on Mean	4.91938	2	6	0.0543613
	Based on trimmed mean	4.35277	2	6	0.067922								Based on Median	0.747583	2	6	0.512991
G1	Based on Mean	4.85735	2	6	0.055659								Based on Median and with adjusted df	0.747583	2	2.89025	0.547424
	Based on Median	0.350615	2	6	0.717778								Based on trimmed mean	4.32018	2	6	0.0688334
	Based on Median and with adjusted df	0.350615	2	2.83896	0.731002							S	Based on Mean	3.54685	2	6	0.0962204
	Based on trimmed mean	3.93361	2	6	0.081								Based on Median	0.341589	2	6	0.72361
S	Based on Mean	1.90438	2	6	0.228882								Based on Median and with adjusted df	0.341589	2	2.77048	0.736883
	Based on Median	0.209995	2	6	0.816302								Based on trimmed mean	3.01537	2	6	0.124044
	Based on Median and with adjusted df	0.209995	2	3.49106	0.82013							G2M	Based on Mean	6.42723	2	6	0.0322264
	Based on trimmed mean	1.65188	2	6	0.268213								Based on Median	1.82407	2	6	0.240504
G2M	Based on Mean	0.391319	2	6	0.692242								Based on Median and with adjusted df	1.82407	2	2.15632	0.343826
	Based on Median	0.0393686	2	6	0.961642								Based on trimmed mean	5.95709	2	6	0.0375719
	Based on Median and with adjusted df	0.0393686	2	5.23714	0.961678
	Based on trimmed mean	0.33344	2	6	0.72893							ANOVA
														Sum of Squares	df	Mean Square	F	Sig.
ANOVA												subG1	Between Groups	17.1235	2	8.56173	52.0611	0.000161745	***
		Sum of Squares	df	Mean Square	F	Sig.							Within Groups	0.986733	6	0.164456
subG1	Between Groups	6.39607	2	3.19803	3.45128	0.10056							Total	18.1102	8
	Within Groups	5.55973	6	0.926622								G1	Between Groups	293.758	2	146.879	271.178	1.30998e-06	***
	Total	11.9558	8										Within Groups	3.2498	6	0.541633
G1	Between Groups	727.109	2	363.554	151.677	7.29604e-06	***						Total	297.008	8
	Within Groups	14.3814	6	2.3969								S	Between Groups	26.1532	2	13.0766	16.3935	0.00370163	**
	Total	741.49	8										Within Groups	4.786	6	0.797667
S	Between Groups	210.986	2	105.493	253.901	1.59244e-06	***						Total	30.9392	8
	Within Groups	2.49293	6	0.415489								G2M	Between Groups	267.037	2	133.519	128.615	1.18425e-05	***
	Total	213.479	8										Within Groups	6.22873	6	1.03812
G2M	Between Groups	226.059	2	113.03	59.108	0.000112699	***						Total	273.266	8
	Within Groups	11.4735	6	1.91226
	Total	237.533	8									Post Hoc Tests
Post Hoc Tests												Multiple Comparisons
												Scheffe
Multiple Comparisons												Dependent Variable	(I) Knockdowncul3	(J) Knockdowncul3	Mean Difference (I-J)	Std. Error	Sig.	95% Confidence Interval
Scheffe																		Lower Bound	Upper Bound
Dependent Variable	(I) Knockdowncul3	(J) Knockdowncul3	Mean Difference (I-J)	Std. Error	Sig.	95% Confidence Interval						subG1	SiNC	SiCul#1	-2.43333*	0.331115	0.000999676	-3.4953	-1.37136	***
						Lower Bound	Upper Bound							SiCul#2	-3.24667*	0.331115	0.000202687	-4.30864	-2.1847	***
subG1	SiNC	SiCul#1	-2.03667	0.78597	0.105083	-4.55747	0.484141	ns					SiCul#1	SiNC	2.43333*	0.331115	0.000999676	1.37136	3.4953
		SiCul#2	-0.723333	0.78597	0.672914	-3.24414	1.79747	ns						SiCul#2	-0.813333	0.331115	0.123954	-1.8753	0.248637	ns
	SiCul#1	SiNC	2.03667	0.78597	0.105083	-0.484141	4.55747						SiCul#2	SiNC	3.24667*	0.331115	0.000202687	2.1847	4.30864
		SiCul#2	1.31333	0.78597	0.317811	-1.20747	3.83414	ns						SiCul#1	0.813333	0.331115	0.123954	-0.248637	1.8753
	SiCul#2	SiNC	0.723333	0.78597	0.672914	-1.79747	3.24414					G1	SiNC	SiCul#1	-11.06333*	0.600907	5.26162e-06	-12.9906	-9.13607	***
		SiCul#1	-1.31333	0.78597	0.317811	-3.83414	1.20747							SiCul#2	-12.95333*	0.600907	2.07153e-06	-14.8806	-11.0261	***
G1	SiNC	SiCul#1	-18.56000*	1.26409	1.98561e-05	-22.6143	-14.5057	***					SiCul#1	SiNC	11.06333*	0.600907	5.26162e-06	9.13607	12.9906
		SiCul#2	-19.53667*	1.26409	1.47131e-05	-23.5909	-15.4824	***						SiCul#2	-1.89	0.600907	0.053811	-3.81726	0.0372631	ns
	SiCul#1	SiNC	18.56000*	1.26409	1.98561e-05	14.5057	22.6143						SiCul#2	SiNC	12.95333*	0.600907	2.07153e-06	11.0261	14.8806
		SiCul#2	-0.976667	1.26409	0.752359	-5.03094	3.07761	ns						SiCul#1	1.89	0.600907	0.053811	-0.0372631	3.81726
	SiCul#2	SiNC	19.53667*	1.26409	1.47131e-05	15.4824	23.5909					S	SiNC	SiCul#1	0.94	0.729231	0.480282	-1.39883	3.27883	ns
		SiCul#1	0.976667	1.26409	0.752359	-3.07761	5.03094							SiCul#2	3.99333*	0.729231	0.00463444	1.6545	6.33217	**
S	SiNC	SiCul#1	10.83333*	0.526301	2.72248e-06	9.14535	12.5213	***					SiCul#1	SiNC	-0.94	0.729231	0.480282	-3.27883	1.39883
		SiCul#2	9.59667*	0.526301	5.56972e-06	7.90868	11.2846	***						SiCul#2	3.05333*	0.729231	0.016577	0.714501	5.39217	*
	SiCul#1	SiNC	-10.83333*	0.526301	2.72248e-06	-12.5213	-9.14535						SiCul#2	SiNC	-3.99333*	0.729231	0.00463444	-6.33217	-1.6545
		SiCul#2	-1.23667	0.526301	0.141239	-2.92465	0.451316	ns						SiCul#1	-3.05333*	0.729231	0.016577	-5.39217	-0.714501
	SiCul#2	SiNC	-9.59667*	0.526301	5.56972e-06	-11.2846	-7.90868					G2M	SiNC	SiCul#1	11.74667*	0.831914	2.49349e-05	9.0785	14.4148	***
		SiCul#1	1.23667	0.526301	0.141239	-0.451316	2.92465							SiCul#2	11.35333*	0.831914	3.04e-05	8.68517	14.0215	***
G2M	SiNC	SiCul#1	10.02333*	1.12909	0.000354116	6.40206	13.6446	***					SiCul#1	SiNC	-11.74667*	0.831914	2.49349e-05	-14.4148	-9.0785
		SiCul#2	11.15000*	1.12909	0.000194705	7.52873	14.7713	***						SiCul#2	-0.393333	0.831914	0.896067	-3.0615	2.27483	ns
	SiCul#1	SiNC	-10.02333*	1.12909	0.000354116	-13.6446	-6.40206						SiCul#2	SiNC	-11.35333*	0.831914	3.04e-05	-14.0215	-8.68517
		SiCul#2	1.12667	1.12909	0.630895	-2.49461	4.74794	ns						SiCul#1	0.393333	0.831914	0.896067	-2.27483	3.0615
	SiCul#2	SiNC	-11.15000*	1.12909	0.000194705	-14.7713	-7.52873					*. The mean difference is significant at the 0.05 level.
		SiCul#1	-1.12667	1.12909	0.630895	-4.74794	2.49461
*. The mean difference is significant at the 0.05 level.
												Homogeneous Subsets
Homogeneous Subsets												subG1
												Scheffea
subG1												Knockdowncul3	N	Subset for alpha = 0.05
Scheffea														1	2
Knockdowncul3	N	Subset for alpha = 0.05										SiNC	3	1.06667
		1										SiCul#1	3		3.5
SiNC	3	0.82										SiCul#2	3		4.31333
SiCul#2	3	1.54333										Sig.		1	0.123954
SiCul#1	3	2.85667										Means for groups in homogeneous subsets are displayed.
Sig.		0.105083										a. Uses Harmonic Mean Sample Size = 3.000.
Means for groups in homogeneous subsets are displayed.
a. Uses Harmonic Mean Sample Size = 3.000.												G1
												Scheffea
G1												Knockdowncul3	N	Subset for alpha = 0.05
Scheffea														1	2
Knockdowncul3	N	Subset for alpha = 0.05										SiNC	3	37.7433
		1	2									SiCul#1	3		48.8067
SiNC	3	48.1167										SiCul#2	3		50.6967
SiCul#1	3		66.6767									Sig.		1	0.053811
SiCul#2	3		67.6533									Means for groups in homogeneous subsets are displayed.
Sig.		1	0.752359									a. Uses Harmonic Mean Sample Size = 3.000.
Means for groups in homogeneous subsets are displayed.
a. Uses Harmonic Mean Sample Size = 3.000.												S
												Scheffea
S												Knockdowncul3	N	Subset for alpha = 0.05
Scheffea														1	2
Knockdowncul3	N	Subset for alpha = 0.05										SiCul#2	3	34.0833
		1	2									SiCul#1	3		37.1367
SiCul#1	3	18.27										SiNC	3		38.0767
SiCul#2	3	19.5067										Sig.		1	0.480282
SiNC	3		29.1033									Means for groups in homogeneous subsets are displayed.
Sig.		0.141239	1									a. Uses Harmonic Mean Sample Size = 3.000.
Means for groups in homogeneous subsets are displayed.
a. Uses Harmonic Mean Sample Size = 3.000.												G2M
												Scheffea
G2M												Knockdowncul3	N	Subset for alpha = 0.05
Scheffea														1	2
Knockdowncul3	N	Subset for alpha = 0.05										SiCul#1	3	9.79
		1	2									SiCul#2	3	10.1833
SiCul#2	3	11.8833										SiNC	3		21.5367
SiCul#1	3	13.01										Sig.		0.896067	1
SiNC	3		23.0333									Means for groups in homogeneous subsets are displayed.
Sig.		0.630895	1									a. Uses Harmonic Mean Sample Size = 3.000.
Means for groups in homogeneous subsets are displayed.
a. Uses Harmonic Mean Sample Size = 3.000.

## Sheet: ANOVA-post hoc Fig3C-3D
Cell cycle protein expression after Cul3 knockdown in drug-resistant CCA cells by Western blot																	Cell cycle protein expression after Cul3 knockdown in drug-resistant CCA cells by Western blot
																	KKU-213A-GR		Intensity			blank substraction
KKU-213A-FR		Intensity			blank substraction														IntDen1	IntDen2	IntDen3	IntDen1	IntDen2	IntDen3	Fold1	Fold2	Fold3	Average	SD	p value
		IntDen1	IntDen2	IntDen3	IntDen1	IntDen2	IntDen3	Fold1	Fold2	Fold3	Average	SD	p value				Cyclin D	siNC	66452	55700	45312	59021	48269	30817	1	1	1	1	0
Cyclin D	siNC	87816	69537	82579	82961	64682	77724	1	1	1	1	0						siCul3#1	15851	19312	29892	8420	11881	15397	0.142661	0.246141	0.499627	0.296143	0.183661	0.00267316
	siCul3#1	23869	27137	25316	19014	22282	20461	0.229192	0.344485	0.263252	0.278976	0.0592333	2.99149e-05					siCul3#2	14204	19549	21921	6773	12118	7426	0.114756	0.251051	0.240971	0.202259	0.0759478	5.36815e-05
	siCul3#2	45304	40782	30432	40449	35927	25577	0.487566	0.55544	0.329075	0.457361	0.116167	0.00126825				CDK4	siNC	665.382	12630	770.418	648.491	12006	753.527	1	1	1	1	0
CDK4	siNC	56864	40817	59985	51518	35471	54639	1	1	1	1	0						siCul3#1	576.312	8580	570.902	559.421	7956	554.011	0.86265	0.662669	0.735224	0.753514	0.101238	0.0135094
	siCul3#1	50948	37579	45087	45602	32233	39741	0.885166	0.908714	0.727338	0.840406	0.0986254	0.0486737					siCul3#2	230.968	5168	187.349	214.077	4544	170.458	0.330116	0.378477	0.226214	0.311602	0.0778019	0.000105751
	siCul3#2	38470	30717	27769	33124	25371	22423	0.64296	0.71526	0.410385	0.589535	0.159305	0.0111362				CDK6	siNC	56442	48105	35070	53577	38241	32117	1	1	1	1	0
CDK6	siNC	106145	63345	81764	94537	51737	70156	1	1	1	1	0						siCul3#1	41233	28896	25738	38368	19032	22785	0.716128	0.497686	0.709437	0.641084	0.124231	0.00746896
	siCul3#1	47874	42182	48038	36266	30574	36430	0.383617	0.59095	0.519271	0.497946	0.105299	0.001173					siCul3#2	17898	27051	13160	15033	17187	10207	0.280587	0.449439	0.317807	0.349278	0.0887163	0.000221111
	siCul3#2	56973	47602	40940	45365	35994	29332	0.479865	0.695711	0.418097	0.531224	0.145759	0.00508868
																	Statistic analysis
Statistic analysis																	Oneway
Descriptives																	Descriptives
		N	Mean	Std. Deviation	Std. Error	95% Confidence Interval for Mean		Minimum	Maximum										N	Mean	Std. Deviation	Std. Error	95% Confidence Interval for Mean		Minimum	Maximum
						Lower Bound	Upper Bound																Lower Bound	Upper Bound
CyclinD	SiNC	3	1	0	0	1	1	1	1								CyclinD	SiNC	3	1	0	0	1	1	1	1
	SiCul#1	3	0.276667	0.0568624	0.0328295	0.135413	0.417921	0.23	0.34									SiCul#1	3	0.296667	0.184481	0.10651	-0.16161	0.754944	0.14	0.5
	SiCul#2	3	0.46	0.117898	0.0680686	0.167124	0.752876	0.33	0.56									SiCul#2	3	0.2	0.0781025	0.0450925	0.00598264	0.394017	0.11	0.25
	Total	9	0.578889	0.332169	0.110723	0.323561	0.834216	0.23	1									Total	9	0.498889	0.391198	0.130399	0.198187	0.799591	0.11	1
CDK4	SiNC	3	1	0	0	1	1	1	1								CDK4	SiNC	3	1	0	0	1	1	1	1
	SiCul#1	3	0.843333	0.0986577	0.05696	0.598254	1.08841	0.73	0.91									SiCul#1	3	0.753333	0.100664	0.0581187	0.503269	1.0034	0.66	0.86
	SiCul#2	3	0.59	0.160935	0.0929157	0.190216	0.989784	0.41	0.72									SiCul#2	3	0.313333	0.0763763	0.0440959	0.123604	0.503062	0.23	0.38
	Total	9	0.811111	0.202512	0.067504	0.655447	0.966776	0.41	1									Total	9	0.688889	0.307792	0.102597	0.452299	0.925479	0.23	1
CDK6	SiNC	3	1	0	0	1	1	1	1								CDK6	SiNC	3	1	0	0	1	1	1	1
	SiCul#1	3	0.496667	0.106927	0.0617342	0.231046	0.762287	0.38	0.59									SiCul#1	3	0.643333	0.124231	0.0717248	0.334727	0.95194	0.5	0.72
	SiCul#2	3	0.533333	0.147422	0.0851143	0.167116	0.899551	0.42	0.7									SiCul#2	3	0.35	0.0888819	0.051316	0.129205	0.570795	0.28	0.45
	Total	9	0.676667	0.259519	0.0865063	0.477183	0.87615	0.38	1									Total	9	0.664444	0.292066	0.0973555	0.439942	0.888947	0.28	1
Tests of Homogeneity of Variances																	Tests of Homogeneity of Variances
		Levene Statistic	df1	df2	Sig.														Levene Statistic	df1	df2	Sig.
CyclinD	Based on Mean	5.29466	2	6	0.0473116												CyclinD	Based on Mean	5.79132	2	6	0.0397376
	Based on Median	1.6405	2	6	0.270191													Based on Median	1.57325	2	6	0.282286
	Based on Median and with adjusted df	1.6405	2	2.95405	0.331758													Based on Median and with adjusted df	1.57325	2	3.2	0.334338
	Based on trimmed mean	4.93583	2	6	0.054024													Based on trimmed mean	5.34699	2	6	0.0464273
CDK4	Based on Mean	6.05552	2	6	0.03636												CDK4	Based on Mean	3.35242	2	6	0.105329
	Based on Median	1.14129	2	6	0.380152													Based on Median	1.73797	2	6	0.253856
	Based on Median and with adjusted df	1.14129	2	3.70117	0.41106													Based on Median and with adjusted df	1.73797	2	3.8493	0.289852
	Based on trimmed mean	5.41481	2	6	0.0453138													Based on trimmed mean	3.23414	2	6	0.111438
CDK6	Based on Mean	5.24917	2	6	0.0480987												CDK6	Based on Mean	7.27681	2	6	0.0248765
	Based on Median	1.19065	2	6	0.366875													Based on Median	0.720217	2	6	0.524396
	Based on Median and with adjusted df	1.19065	2	3.32524	0.40741													Based on Median and with adjusted df	0.720217	2	3.14899	0.552629
	Based on trimmed mean	4.78158	2	6	0.0573007													Based on trimmed mean	6.10126	2	6	0.0358146
ANOVA																	ANOVA
		Sum of Squares	df	Mean Square	F	Sig.													Sum of Squares	df	Mean Square	F	Sig.
CyclinD	Between Groups	0.848422	2	0.424211	74.2782	5.85049e-05	***										CyclinD	Between Groups	1.14402	2	0.572011	42.7583	0.000281808	***
	Within Groups	0.0342667	6	0.00571111														Within Groups	0.0802667	6	0.0133778
	Total	0.882689	8															Total	1.22429	8
CDK4	Between Groups	0.256822	2	0.128411	10.811	0.0102491	*										CDK4	Between Groups	0.725956	2	0.362978	68.2004	7.48025e-05	***
	Within Groups	0.0712667	6	0.0118778														Within Groups	0.0319333	6	0.00532222
	Total	0.328089	8															Total	0.757889	8
CDK6	Between Groups	0.472467	2	0.236233	21.3678	0.001866	**										CDK6	Between Groups	0.635756	2	0.317878	40.87	0.000319787	***
	Within Groups	0.0663333	6	0.0110556														Within Groups	0.0466667	6	0.00777778
	Total	0.5388	8															Total	0.682422	8
																	Post Hoc Tests
Post Hoc Tests
																	Multiple Comparisons
Multiple Comparisons																	Scheffe
Scheffe																	Dependent Variable	(I) Knockdowncul3	(J) Knockdowncul3	Mean Difference (I-J)	Std. Error	Sig.	95% Confidence Interval
Dependent Variable	(I) Knockdowncul3	(J) Knockdowncul3	Mean Difference (I-J)	Std. Error	Sig.	95% Confidence Interval																	Lower Bound	Upper Bound
						Lower Bound	Upper Bound										CyclinD	SiNC	SiCul#1	.70333*	0.0944379	0.000930125	0.400447	1.00622	***
CyclinD	SiNC	SiCul#1	.72333*	0.0617042	7.32203e-05	0.525432	0.921235	***											SiCul#2	.80000*	0.0944379	0.00045938	0.497113	1.10289	***
		SiCul#2	.54000*	0.0617042	0.000383451	0.342099	0.737901	***										SiCul#1	SiNC	-.70333*	0.0944379	0.000930125	-1.00622	-0.400447
	SiCul#1	SiNC	-.72333*	0.0617042	7.32203e-05	-0.921235	-0.525432												SiCul#2	0.0966667	0.0944379	0.617022	-0.20622	0.399553	ns
		SiCul#2	-0.183333	0.0617042	0.0662555	-0.381235	0.014568	ns										SiCul#2	SiNC	-.80000*	0.0944379	0.00045938	-1.10289	-0.497113
	SiCul#2	SiNC	-.54000*	0.0617042	0.000383451	-0.737901	-0.342099												SiCul#1	-0.0966667	0.0944379	0.617022	-0.399553	0.20622
		SiCul#1	0.183333	0.0617042	0.0662555	-0.014568	0.381235										CDK4	SiNC	SiCul#1	.24667*	0.0595663	0.0174141	0.055622	0.437711	*
CDK4	SiNC	SiCul#1	0.156667	0.0889861	0.286671	-0.128735	0.442068	ns											SiCul#2	.68667*	0.0595663	8.06208e-05	0.495622	0.877711	***
		SiCul#2	.41000*	0.0889861	0.0106997	0.124599	0.695401	*										SiCul#1	SiNC	-.24667*	0.0595663	0.0174141	-0.437711	-0.055622
	SiCul#1	SiNC	-0.156667	0.0889861	0.286671	-0.442068	0.128735												SiCul#2	.44000*	0.0595663	0.000972338	0.248955	0.631045	**
		SiCul#2	0.253333	0.0889861	0.0769761	-0.0320679	0.538735	ns										SiCul#2	SiNC	-.68667*	0.0595663	8.06208e-05	-0.877711	-0.495622
	SiCul#2	SiNC	-.41000*	0.0889861	0.0106997	-0.695401	-0.124599												SiCul#1	-.44000*	0.0595663	0.000972338	-0.631045	-0.248955
		SiCul#1	-0.253333	0.0889861	0.0769761	-0.538735	0.0320679										CDK6	SiNC	SiCul#1	.35667*	0.0720082	0.00758789	0.125718	0.587616	**
CDK6	SiNC	SiCul#1	.50333*	0.0858509	0.00328223	0.227987	0.778679	**											SiCul#2	.65000*	0.0720082	0.000322623	0.419051	0.880949	***
		SiCul#2	.46667*	0.0858509	0.00480859	0.191321	0.742013	**										SiCul#1	SiNC	-.35667*	0.0720082	0.00758789	-0.587616	-0.125718
	SiCul#1	SiNC	-.50333*	0.0858509	0.00328223	-0.778679	-0.227987												SiCul#2	.29333*	0.0720082	0.0187266	0.0623843	0.524282	*
		SiCul#2	-0.0366667	0.0858509	0.914071	-0.312013	0.238679	ns										SiCul#2	SiNC	-.65000*	0.0720082	0.000322623	-0.880949	-0.419051
	SiCul#2	SiNC	-.46667*	0.0858509	0.00480859	-0.742013	-0.191321												SiCul#1	-.29333*	0.0720082	0.0187266	-0.524282	-0.0623843
		SiCul#1	0.0366667	0.0858509	0.914071	-0.238679	0.312013										*. The mean difference is significant at the 0.05 level.
*. The mean difference is significant at the 0.05 level.
																	Homogeneous Subsets
Homogeneous Subsets
																	CyclinD
CyclinD																	Scheffea
Scheffea																	Knockdowncul3	N	Subset for alpha = 0.05
Knockdowncul3	N	Subset for alpha = 0.05																	1	2
		1	2														SiCul#2	3	0.2
SiCul#1	3	0.276667															SiCul#1	3	0.296667
SiCul#2	3	0.46															SiNC	3		1
SiNC	3		1														Sig.		0.617022	1
Sig.		0.0662555	1														Means for groups in homogeneous subsets are displayed.
Means for groups in homogeneous subsets are displayed.																	a. Uses Harmonic Mean Sample Size = 3.000.
a. Uses Harmonic Mean Sample Size = 3.000.
																	CDK4
CDK4																	Scheffea
Scheffea																	Knockdowncul3	N	Subset for alpha = 0.05
Knockdowncul3	N	Subset for alpha = 0.05																	1	2	3
		1	2														SiCul#2	3	0.313333
SiCul#2	3	0.59															SiCul#1	3		0.753333
SiCul#1	3	0.843333	0.843333														SiNC	3			1
SiNC	3		1														Sig.		1	1	1
Sig.		0.0769761	0.286671														Means for groups in homogeneous subsets are displayed.
Means for groups in homogeneous subsets are displayed.																	a. Uses Harmonic Mean Sample Size = 3.000.
a. Uses Harmonic Mean Sample Size = 3.000.
																	CDK6
CDK6																	Scheffea
Scheffea																	Knockdowncul3	N	Subset for alpha = 0.05
Knockdowncul3	N	Subset for alpha = 0.05																	1	2	3
		1	2														SiCul#2	3	0.35
SiCul#1	3	0.496667															SiCul#1	3		0.643333
SiCul#2	3	0.533333															SiNC	3			1
SiNC	3		1														Sig.		1	1	1
Sig.		0.914071	1														Means for groups in homogeneous subsets are displayed.
Means for groups in homogeneous subsets are displayed.																	a. Uses Harmonic Mean Sample Size = 3.000.
a. Uses Harmonic Mean Sample Size = 3.000.
